# Supplementary material
Source: PubMed Central journal article supplement (PMC3877787)
Supplement: supp_tpc.113.114785_tpc114785_Supplemental_Data.pdf [file supp_tpc.113.114785_tpc114785_Supplemental_Data.pdf]

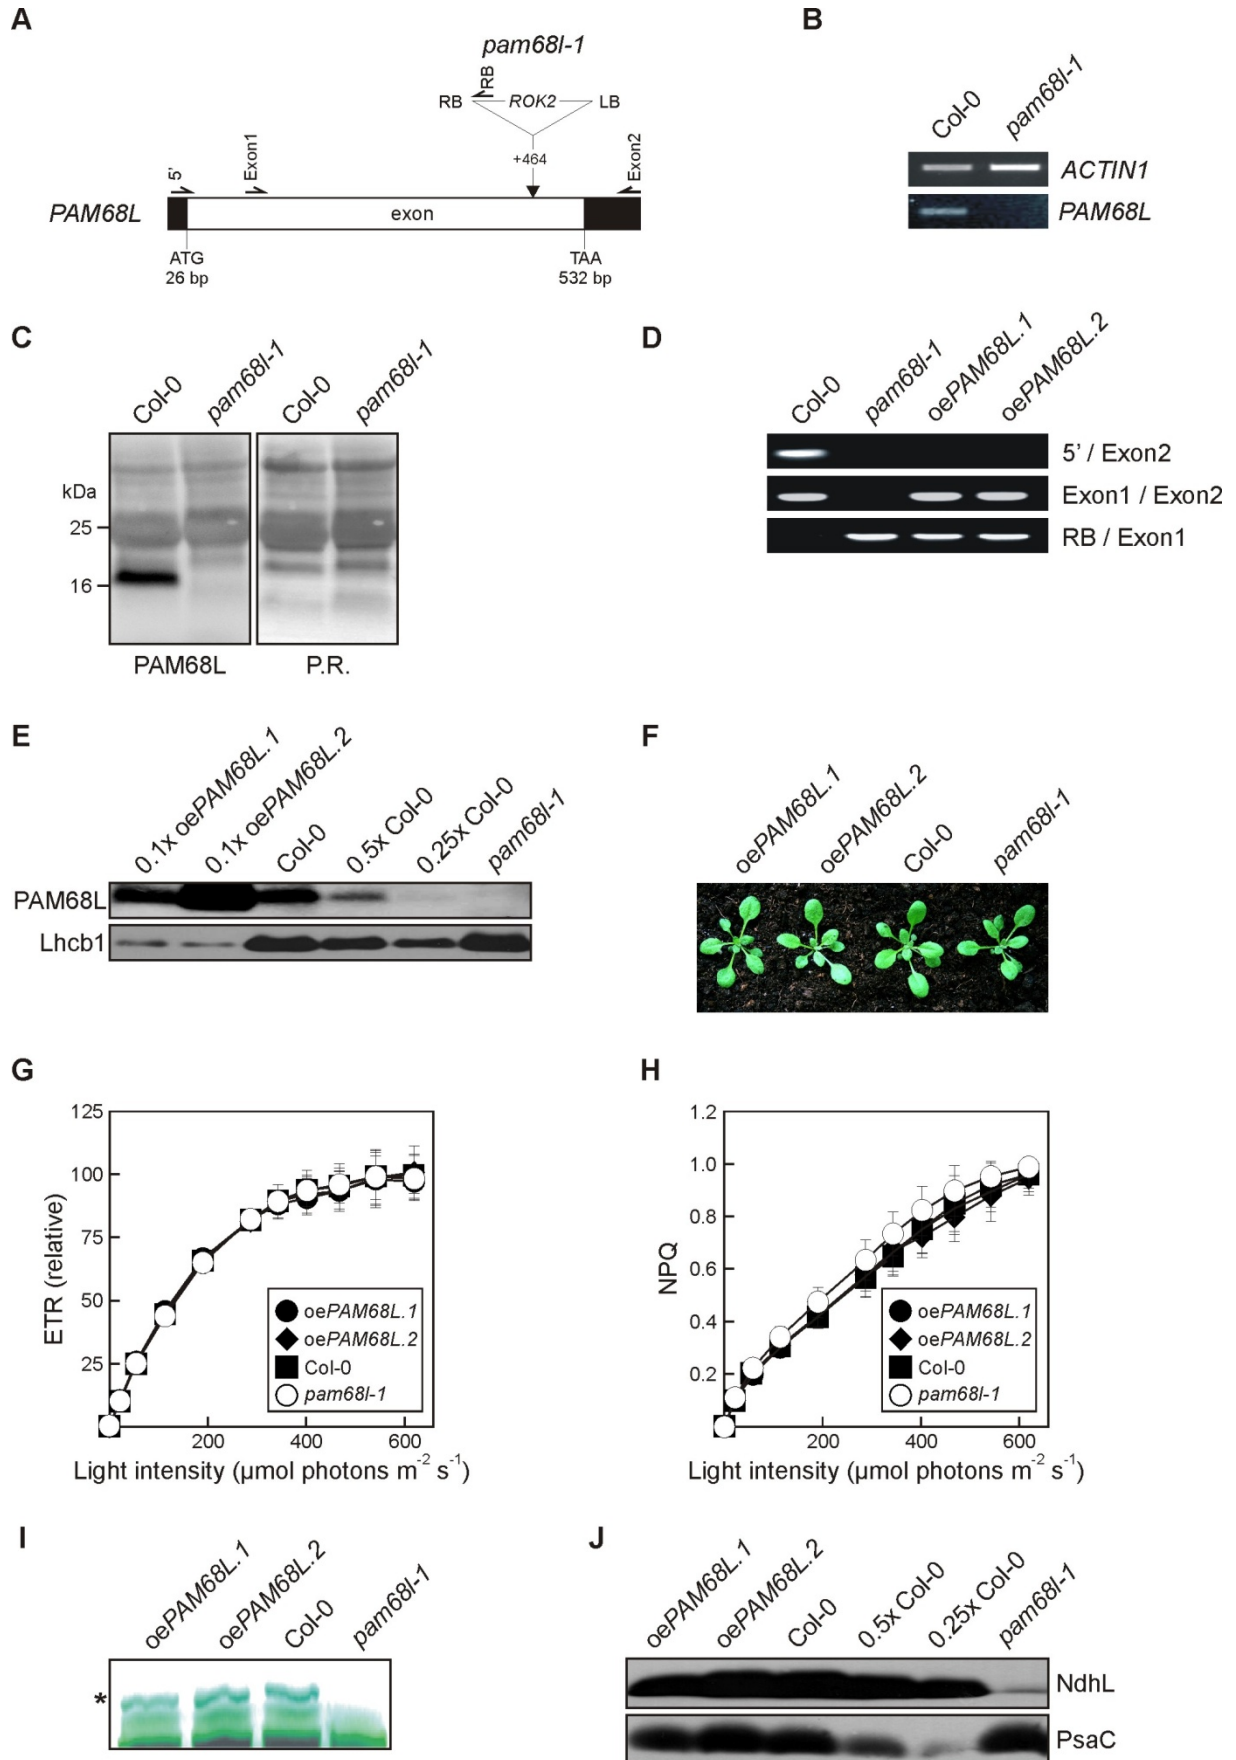

**Supplemental Figure 1.** Analysis of mutants and overexpressors of *Arabidopsis* PAM68L.

- (A)** T-DNA tagging of the *PAM68L/At5g52780* locus. The exon is shown as a white box and UTRs as black boxes. Location and orientation of the T-DNA insertion and of primers used for genotyping are indicated. The *pam68l-1* line corresponds to SALK\_143426 from the Salk T-DNA collection. Note that the T-DNA is not drawn to scale.
- (B)** RT-PCR analysis was performed on transcripts from WT (Col-0) and *pam68l-1* plants using the gene-specific primers (Exon1 and Exon2) and *ACTIN1* primers as a positive control.
- (C)** Thylakoid proteins corresponding to 10 µg of total Chl from WT (Col-0) and *pam68l-1* plants were fractionated by SDS-PAGE, blotted onto membrane and visualized with antibodies raised against PAM68L. The Ponceau Red stain (P.R.) of the membrane prior to immunodetection is shown as loading control.
- (D)** PCR on genomic DNA from WT, *pam68l-1* and two independent *35S:PAM68L pam68l-1* (*oePAM68L*) plants using primer combinations specific for either the original *PAM68L* locus (5' / Exon2), the protein-encoding sequence (Exon1 / Exon2) or the *pam68l-1* mutant allele (RB / Exon1).
- (E)** Thylakoid proteins corresponding to 10 µg of total Chl from WT (Col-0) and *pam68l-1*, and to 1 µg of total Chl (0.1x) from the two *oePAM68L* plants were fractionated by SDS-PAGE, blotted and visualized with antibodies raised against PAM68L and, as control, Lhcb1. Decreasing amounts of WT proteins were added to lanes marked 0.5x Col-0 and 0.25x Col-0.
- (F)** Four-week-old WT (Col-0), *pam68l-1* and the two *oePAM68L* plants grown in the greenhouse.
- (G)** Dependence of the relative electron transport rate (ETR) on light intensity. ETR is expressed relative to the maximum ETR in the WT (Col-0) (100%). Values represent averages of twelve measured biological replicates and error bars indicate standard deviations.
- (H)** Dependence of non-photochemical quenching (NPQ) on light intensity. Values represent averages of twelve measured biological replicates and error bars indicate standard deviations.
- (I)** Magnification of the top section of the BN-PAGE gel shown in Figure 2B. The star symbol indicates the PSI-NDH complex.
- (J)** Thylakoid proteins corresponding to 10 µg of total Chl from WT (Col-0), *pam68l-1* plants and two *oePAM68L* lines were fractionated by SDS-PAGE, blotted and immunodetected with antibodies recognizing NdhL or PsaC (as control). Decreasing amounts of WT proteins were added to the lanes marked 0.5x Col-0 and 0.25x Col-0.

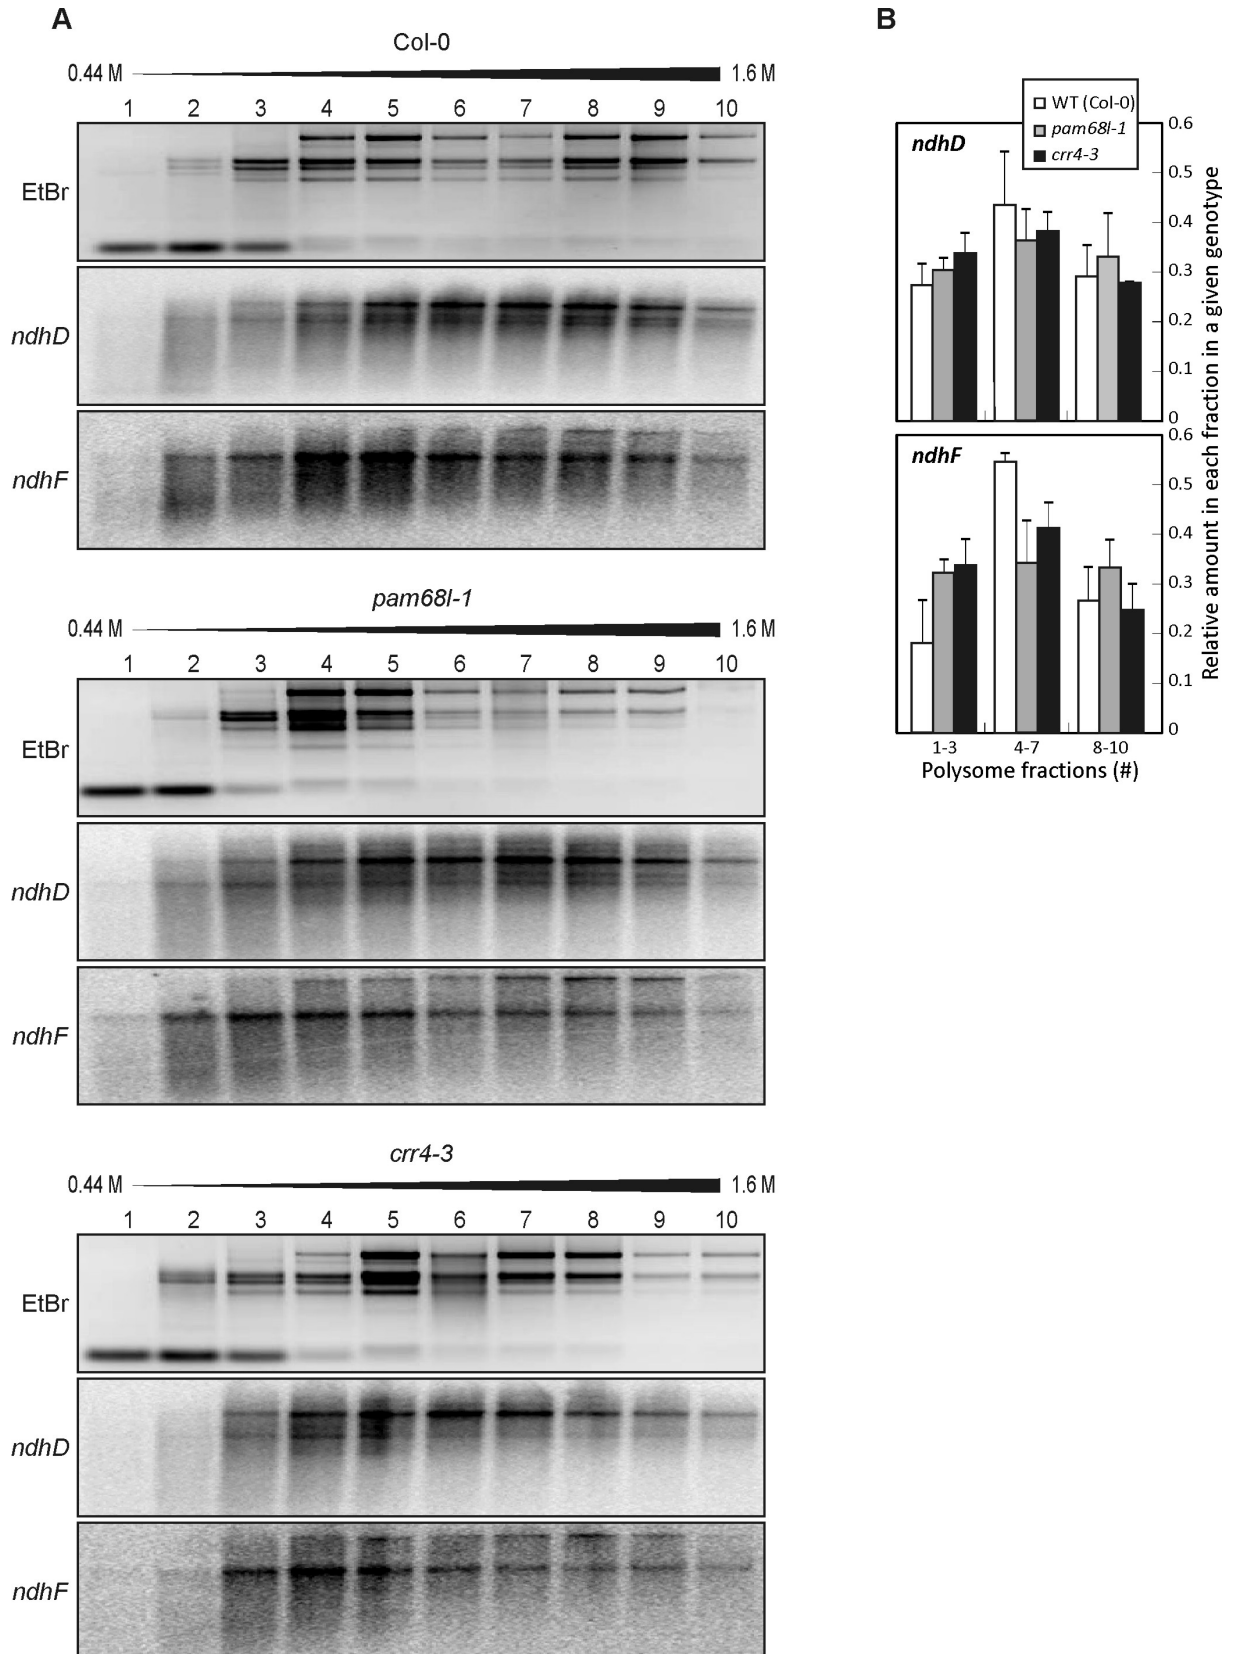

**Supplemental Figure 2.** Analysis of plastid *ndh* transcript association with polysomes.

**(A)** Association of *ndhD* (*ndhH/A/I/G/E/psaC/ndhD*) and *ndhF* mRNAs with polysomes. Whole-cell extracts from WT (Col-0) and mutant plants (*pam68l-1* and *crr4-3*) were fractionated in linear 0.44 M to 1.6 M (15% to 55%) sucrose gradients by ultracentrifugation. Gradients were divided into 10 fractions, and RNA was isolated from equal volumes of each. RNA gels were stained with ethidium

bromide (EtBr) to visualize the distribution of rRNAs, blotted and then hybridized with probes specific for *ndhD* and *ndhF*.

**(B)** Signal intensities for *ndhD* and *ndhF* transcripts were normalized relative to rRNA signals (see Methods), and values for fractions 1-3, 4-7, and 8-10 (relative to the total signal) were calculated for each genotype. Averages of three biological replicates are shown; error bars indicate standard deviations.

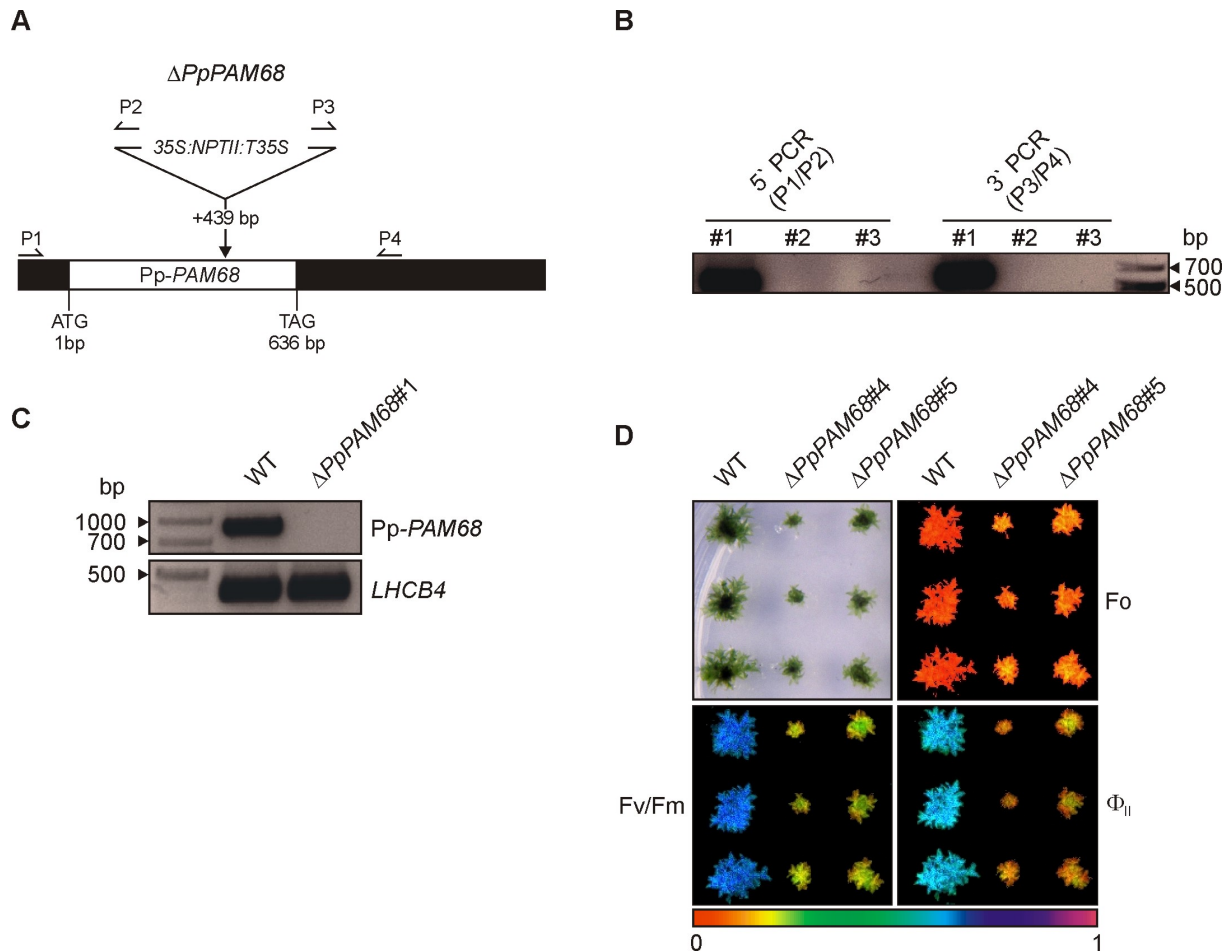

**Supplemental Figure 3.** Generation and characterization of the *Physcomitrella* knockout mutant  $\Delta PpPAM68$ .

**(A)** Site of integration of the 35S:NPTII:T35S cassette in the  $\Delta PpPAM68$  line. The intron-free Pp-PAM68 coding sequence is shown as a white box, UTR regions are indicated as black boxes. The location and orientation of primers used for PCR assays are indicated.

**(B)** Screening of *PpPAM68* knockout mutant lines. Genomic DNA was isolated from three kanamycin-resistant moss plants and homologous recombination of the selection cassette was verified by PCR using the primer pairs P1/P2 and P3/P4 shown in panel A. Primer sequences are provided in Supplemental Table 3 online. Note that  $\Delta PpPAM68\#4$  and  $\Delta PpPAM68\#5$  (shown in panel D), as well as  $\Delta PpPAM68\#6$  and  $\Delta PpPAM68\#7$ , behave like  $\Delta PpPAM68\#1$ .

**(C)** RT-PCR analysis of the mutant line  $\Delta PpPAM68\#1$ . RNA isolation and cDNA synthesis was carried out as described in the Methods section. Pp-PAM68 transcript abundance was examined by PCR using WT or  $\Delta PpPAM68\#1$  cDNA as template with the primer pair P1/P4. As control, *LHCB4* transcripts were detected with appropriate primers (see Supplemental Table 3 online). Note that  $\Delta PpPAM68\#4$ , #5 #6 and #7 behave like  $\Delta PpPAM68\#1$ .

**(D)** Characterization of the photosynthetic phenotype in two additional, independent knockout moss plants ( $\Delta PpPAM68\#4$  and  $\Delta PpPAM68\#5$ ). The photosynthetic parameters  $F_o$ , Fv/Fm and  $\Phi_{II}$  were determined using an Imaging PAM system as in Figure 7C. Three replicates of each genotype were analyzed. Note that  $\Delta PpPAM68\#6$  and  $\Delta PpPAM68\#7$  behave like  $\Delta PpPAM68\#1$ .

PAM68L RTSEKPGRPDPDPEDDPPIPQEVFERMMGRIVVSVGTPLGLGVAILKVL  
 Al68L -SSENPGRPDQEDDPPIPQEVFERMMGRIVVSVGTPLGLGVAILKILE  
 Zm68L -AKQDGGGSNGEVDDDDDELQPQVFDRLRRIAFTVGLPMASGVALLNVYD  
 Os68L -EALDVKSGGEVDEDDDELQPQVFDRLRRIIMFMVGVPMASGVLLNLYG  
 Vv68L -TVPRKNSGNGDDDDDEKIPQVVFDRMIVRILFFVVGAPMGIGVALLNLF  
 Pt68L -SSIKKTSKNTNNNDDEEIPPEVLYRIKRVLVSVMGAPMALAFASMNVI  
 PAM68 -DEDEDDEDEDERERGVIPPIVITNRMISRMGFTVGLPLFIGLLFFPFFY  
 Al68 -NQSDKEDDDEDERERGVIPPIVITNRMISRMGFTVGLPLFIGLLFFPFFY  
 Vv68 -FYEEEEEEEGAEAEAGVPIVITNRMISRMGFSVGIPLMIGLLFFPFFY  
 Pt68 -DDDEDEEEEEQEEPDAGVPEVVITNRMTRMGISVGLPLFVGLFFPFFY  
 Zm68 -EEEEEEDEDEEEERDATIPEVVITNRMRRV GASVGLPLALGVGLFPVY  
 Os68 -EGSEEEDEEEEEERDVAIPEVVITNRMRRVGSVGLPLAVGVAFLPAFY  
 Pp -GTQADPQDERQEPEDDVPEVVITNRMKRIAFTVGIPIFAIGVAFFVLYY  
 Mp -ERMEEKRAQYQAASAKGIPQVVTDRMLKRITIFSGVPLLLGFSTGPLFY  
 Ot AAKRDAFDAKYAQRS AQGIPQIVTDRMLKRVGIFCGTPLMLGFTTGPLFY  
 Cr -PEPASAPAPARRAVVRETPQIVVDRMFRRILVFTGVPVFTGMALFPLFY  
 Vc -EAAQSGGPVPRTRVRETPQVVVDRMFRRILVCTGVPVFTGMALFPLFY  
 Pt -VRELLDADQVQEA AAAI PERVAQRMGARMPLPFVGLPFFFLGMGVFVGF  
 Tp RDLRATDSSLKEDPNAAAPEKVAQRMGKRMLPFVGVPLFGTFATFIGFW  
 Es -SVMQAKAATEGDPDAGSIPPIVSNRMLSRMVPFFVLPALGGVGVFVTVY  
 Ma SPVPPPLKNRSEETSLKAIQVVSQRM AKRMAVFCGLPTALGIASFFGFY  
 Cy VKNPEKQKRSNDASLSAIPDSVSKRMIKRMAIFSGIPTGLGMSFFVY  
 Sy -KTSGAKDKKGRSADSGIPAVVSQRMVKRMALFSGIPTGLGMLSFLFY  
 Np -SGKQADKKLTYTKQEMAIQVVSQRMIRRVAGFCGVPALGISVLVVS  
 Av -ADKQDKKQLPYTKEMAIQVVSQRMIRRVAAFCGIPTALGITTLVSSY

PAM68L VLKDRNVWDVPLWVPYLTTLVTFGSSALGIAYGSLSTNLDPAKTNSLFG  
 Al68L VLKDRKVDVPLWVPFLTTLVTFGSSALGIAYGSLSTNLDPTKTNSLFG  
 Zm68L ALKRQGVVPSWVPLLTILVAFGTSALGIAYGTLASWDPDKEGSLGI  
 Os68L ALERGRGVAVPSWVPLLTILVAFGTSALGIAFGTLASWDPKEGSLGL  
 Vv68L AVKDQHLWDVVPWLPFLTTLIAFGASALGIAYGTLSTSWDAEKKGSLGL  
 Pt68L LVMEQHIWNVPKWFMFLTLFLTLGASVCGIAYGALSTSM DPNEKGSFLGF  
 PAM68 YLKVGLKVDVPTWVPFIVSFVFFGTALAGVSYGIVSSSWDPLREGSLLGW  
 Al68 YLKVGLKVDVPTWVPFIVSFVFFGTALAGVSYGIVSSSWDPLRKGSLGW  
 Vv68 YLKVGLKIDVPTWVPFIVSFFVFGSALLGVSYGIVSSSWDPLREGSFLGW  
 Pt68 YLKVGLKIDVPTWVPFIVSFIFFGSALLGVSYGIVSSSWDPKREGSFWGW  
 Zm68 YLKAVAKVDVPTWIPFGVSFVFFGAALAGVSYGIVSASWDPAREGSLGW  
 Os68 YLKKA AKVDVPTWIPFGVSFLFFGAALLGVSYGIVSASWDPAREGSLGW  
 Pp YLKAVKKVDIPEWLPLFTSFLTFGSAGAGITYGVLSASWDPKREGSLLGW  
 Mp LGKTVAHF DLAPWQFFFASTATFGAALVGITYGVLSASWEPGREGSFWGV  
 Ot YFKAVRHVDVPPWVFFFASTATFGAAFIGISYGVLSASWDPREGTFWGG  
 Cr YLRVVM DIEYPLWIVVYSQVLTFGGGLFGITYGALSASWDPREGSAGW  
 Vc WLRVVDIDYPLWIVYIAQVLTFGGGLLGITYGALSASWDPREGSALGW  
 Pt YMATYRNLEYQPALVAASTIVVLLGLVGITYSILSASWDPREGSLLGT  
 Tp YAAVYKDM EQPAIVASTSFVFLAIGLLGITYSVMSSSWDEDREGSGLGF  
 Es VLSHKYDYTIPIYIVAYATQAPFFVALAGITYAIMSASWDEDREGTFFGF  
 Ma WIISHDLLEIPSYVAMLVSLSLFGLGFIGLSYGIFSSASWEDRVDWLGW  
 Cy WIVSHDWLDIPTAAVAVSLGLFGLGVLGLSYGIFSSSWDEHRAGGWGW  
 Sy LVVSRDWF EIPTYVVSLSLLFFGLGVVGLSYGIFSTSWEDE-PGSVWGW  
 Np LLAIYS DIQLAPIAVLLVNMGLFGLGVLGITYGVLSASWDEERVGSLLGL  
 Av LLTIYS DIQLAPIAVLLVNMGFFGLGVLGITYGVLSASWDEERTGSLLGL

|        |                    |
|--------|--------------------|
| PAM68L | KEAKENWVEMWKEDQ--  |
| Al68L  | KEAKENWVEMWKE----  |
| Zm68L  | DEARANWPVLWQEEIE-  |
| Os68L  | EEARANWPVLWEEEIE-  |
| Vv68L  | EEAQONWVDVWKEE---  |
| Pt68L  | EQVQKNWVEMWKEEDE-  |
| PAM68  | NEAKKNWPVFWQSFWN-  |
| Al68   | NEAKKNWPVFWQSFVN-  |
| Vv68   | TEAQNNWPVFWQSLWG-  |
| Pt68   | NEAQKNWPVFWQSLRG-  |
| Zm68   | NEARRNWPVFWDSLGR-  |
| Os68   | NEARRNWPVFWDSLGR-  |
| Pp     | KEAQLNWPVFWDTFRG-  |
| Mp     | TEVKANIPILWQTILGK  |
| Ot     | SEFKENVPVVIISTIMNK |
| Cr     | SEMQANLSILLNRNKQ-  |
| Vc     | TELQANLAILLNRNKN-  |
| Pt     | DEFSKNIENIRDGLKR-  |
| Tp     | DEFSKNVDSLKEGLSR-  |
| Es     | DEAKRNFGNIVEGLRR-  |
| Ma     | QEFQANFGRTIAAWRSG  |
| Cy     | QEFTQNLGRTIQAWRSA  |
| Sy     | PEFRLNLSRTIAVWRNA  |
| Np     | GEFNTNWGRMVTVWRE-  |
| Av     | GEFGTNWGRMVEGWRE-  |

**Supplemental Figure 4.** Alignment of orthologous PAM68 and PAM68L protein sequences for phylogenetic analyses (see Figure 1A).

**Supplemental Table 1.** Quantification of NDH subunit accumulation in different genotypes relative to WT (Col-0) according to Figures 4A and 4B (WT=100%). Immunodetections were repeated two to three times.

|       | <i>pam68l-1</i> | <i>crr2-2</i> | <i>crr4-3</i> | <i>ndhI</i> | <i>pnsb2</i> | <i>pnsb3</i> | <i>ndf5</i> | <i>pnsb4</i> | <i>pns11</i> | <i>ndhs</i> | <i>ndht</i> | <i>ndhu</i> |
|-------|-----------------|---------------|---------------|-------------|--------------|--------------|-------------|--------------|--------------|-------------|-------------|-------------|
| NdhA  | 20              | 10            | 20            | 30          | 20           | 20           | 20          | 20           | 0            | 60          | 40          | 50          |
| NdhH  | 20              | 10            | 20            | 10          | 20           | 20           | 20          | 20           | 0            | 100         | 60          | 60          |
| NdhL  | 20              | 10            | 20            | 0           | 20           | 20           | 40          | 30           | 0            | 40          | 30          | 20          |
| PnsB2 | 20              | 60            | 20            | 80          | 0            | 0            | 40          | 40           | 50           | 80          | 80          | 80          |
| PnsL1 | 40              | 30            | 50            | 100         | 50           | 50           | 50          | 50           | 0            | 100         | 100         | 100         |
| PnsL4 | 30              | 20            | 30            | 60          | 30           | 30           | 30          | 30           | 20           | 100         | 80          | 100         |
| Lhca5 | 50              | 80            | 50            | 90          | 50           | 50           | 50          | 50           | 50           | 100         | 80          | 100         |
| NdhS  | 90              | 70            | 70            | 70          | 90           | 100          | 80          | 100          | 100          | 0           | 70          | 80          |
| NdhT  | 70              | 80            | 80            | 50          | 50           | 40           | 60          | 60           | 30           | 60          | 0           | 100         |



**Supplemental Table 2.** NDH subunits in *P. patens*.

| subcomplex | Protein   | AGI code  | Present in <i>P. patens</i> | Physco identifier | Similarity (%) | Identity (%) | Length Ara | Length Physco | comment or reference                               |
|------------|-----------|-----------|-----------------------------|-------------------|----------------|--------------|------------|---------------|----------------------------------------------------|
| subM       | NdhA      | ATCG01100 | yes                         | NP_904243         | 79             | 71           | 360        | 368           | Only one <i>ndhB</i> gene in <i>P. patens</i>      |
|            | NdhB1     | ATCG00890 | yes                         | NP_904166         | 74             | 65           | 512        | 501           |                                                    |
|            | NdhB2     | ATCG01250 |                             |                   |                |              | 512        |               |                                                    |
|            | NdhC      | ATCG00440 | yes                         | NP_904197         | 85             | 75           | 120        | 121           |                                                    |
|            | NdhD      | ATCG01050 | yes                         | NP_904238         | 81             | 68           | 506        | 501           |                                                    |
|            | NdhE      | ATCG01070 | yes                         | NP_904240         | 80             | 71           | 101        | 100           |                                                    |
|            | NdhF      | ATCG01010 | yes                         | NP_904235         | 67             | 58           | 746        | 720           |                                                    |
| NdhG       | ATCG01080 | yes       | NP_904241                   | 58                | 47             | 176          | 197        |               |                                                    |
| subA       | NdhH      | ATCG01110 | yes                         | NP_904244         | 88             | 83           | 393        | 391           |                                                    |
|            | NdhI      | ATCG01090 | yes                         | NP_904242         | 76             | 70           | 172        | 181           |                                                    |
|            | NdhJ      | ATCG00420 | yes                         | NP_904199         | 85             | 77           | 158        | 158           |                                                    |
|            | NdhK      | ATCG00430 | yes                         | NP_904198         | 67             | 62           | 225        | 261           |                                                    |
|            | NdhL      | AT1G70760 | yes                         | Pp1s101_245V6.1   | 33             | 24           | 191        | 196           |                                                    |
|            | NdhM      | AT4G37925 | yes                         | Pp1s230_42V6.1    | 57             | 44           | 217        | 204           |                                                    |
|            | NdhN      | AT5G58260 | yes                         | Pp1s25_204V6.1    | 58             | 47           | 209        | 255           |                                                    |
|            | NdhO      | AT1G74880 | yes                         | Pp1s230_32V6.1    | 52             | 41           | 158        | 176           |                                                    |
| subB       | PnsB1     | AT1G15980 | yes                         | Pp1s89_87V6.1     | 59             | 46           | 461        | 473           |                                                    |
|            | PnsB2     | AT1G64770 | yes                         | Pp1s88_7V6.1      | 33             | 20           | 348        | 425           |                                                    |
|            | PnsB3     | AT3G16250 | yes                         | Pp1s36_1V6.1      | 44             | 30           | 204        | 179           |                                                    |
|            | PnsB4     | AT1G18730 | yes                         | Pp1s127_94V6.1    | 40             | 31           | 175        | 210           |                                                    |
|            | PnsB5     | AT5G43750 | yes                         | Pp1s235_42V6.2    | 38             | 26           | 212        | 179           |                                                    |
| subL       | PnsL1     | AT2G39470 | no                          |                   |                |              |            |               | Pp1s30_39V6.1 closer related to PPL1               |
|            | PnsL2     | AT1G14150 | no                          |                   |                |              |            |               | Yabuta et al., 2010                                |
|            | PnsL3     | AT3G01440 | no                          |                   |                |              |            |               | Yabuta et al., 2010                                |
|            | PnsL4     | AT4G39710 | no                          |                   |                |              |            |               | Pp1s347_30V6.2 closer related to FKB13 (AT5G45680) |
|            | PnsL5     | AT5G13120 | yes                         | Pp1s196_68V6.1    | 66             | 57           | 259        | 247           |                                                    |
| subE       | NdhS      | AT4G23890 | yes                         | Pp1s123_43V6.1    | 45             | 35           | 250        | 257           |                                                    |
|            | NdhT      | AT4G09350 | yes                         | Pp1s106_74V6.2    | 47             | 34           | 249        | 251           |                                                    |
|            | NdhU      | AT5G21430 | yes                         | Pp1s91_80V6.1     | 39             | 25           | 218        | 229           |                                                    |
|            | Lhca5     | AT1G45474 | yes                         | Pp1s284_6G3.1     | 61             | 55           | 256        | 278           | Alboresi et al., 2008                              |
|            | Lhca6     | AT1G19150 | no                          |                   |                |              |            |               | Alboresi et al., 2008                              |

Protein sequences of *A. thaliana* were blasted against *P. patens* protein databases. Pairwise alignments (AlignX, Vector NTI Advance 9.1.0, Invitrogen Corporation) were performed to calculate sequence similarity and identity values (in %). Putative transit peptide sequences of nucleus-encoded proteins were not excluded in the analysis. The full citation of the references listed in this table can be found in the reference list of the main text.

**Supplemental Table 3.** Overview of oligonucleotides (5' to 3') used in PCR assays.

| Gene                 | Forward primer                                                               | Reverse primer                                                                                | Experiment                                      |
|----------------------|------------------------------------------------------------------------------|-----------------------------------------------------------------------------------------------|-------------------------------------------------|
| <i>ndhA</i>          | ndhA_for:<br>ATGATAATTTATGCAACAGCAGTCCAAACT                                  | ndhA_rev:<br>CAGCTCGCAGACCACCTAAAAAGAATAT                                                     | RNA blot analysis<br>(RBA)                      |
| <i>ndhB</i>          | ndhB_for:<br>AAAGCCTTTCATTTGCTTCTCTTCGATG                                    | ndhB_rev:<br>GCCCCACCCATGAGTAAATATTTTCATAGTA                                                  | RBA                                             |
| <i>ndhC</i>          | ndhC_for:<br>CAAGTGCTATTCTGTGTTTGGCATTTC                                     | ndhC_rev:<br>CCTTTTCGCCATGCATAAACTAAACCA                                                      | RBA                                             |
| <i>ndhD</i>          | ndhD_for:<br>GTGTATCTTGCTTTACCACG                                            | ndhD_rev:<br>AGACGTTTCTTTCCACCCCA                                                             | RBA                                             |
| <i>ndhE</i>          | ndhE_for:<br>ATACTCGAACATGTACTTGTGTTTGAGTGCC                                 | ndhE_rev:<br>GGTCGATTGGTTTATGCGAATTGAT                                                        | RBA                                             |
| <i>ndhF</i>          | ndhF_for:<br>AGGTCCTATTGCTAAATCCGC                                           | ndhF_rev:<br>CGGTTAATCCCGCTGTTGAA                                                             | RBA                                             |
| <i>PAM68L</i>        | PAM68HLattB1:<br><u>GGGGACAAGTTTGTACAAAAAAGCAGGCTTGA</u><br>TGAGAGCTCTCTGTGC | PAM68HLattB2:<br><u>GGGGACCACTTTGTACAAGAAAGCTGGGTC</u><br><u>ACCTGCTCCTTGGTCCTCTTTCCACATC</u> | overexpression in<br><i>planta</i>              |
| <i>PAM68L</i>        | pET151_PamHL_for<br>CACACCTCTGAAAAACCCGGC                                    | pET151_PamHL_rev<br>TTATTGGTCCTCTTTCCAC                                                       | Expression in <i>E. coli</i>                    |
| <i>PAM68L</i>        | Exon1:<br>CACAATCCAAAAACCCTATATCC                                            | Exon2:<br>AGCCAGCTTAAAAGTTTTTATGAG                                                            | Genotyping                                      |
| <i>PAM68L</i>        | 5':<br>CATTAGAAGAAGAAATAGAAATGAG                                             | Exon2:<br>AGCCAGCTTAAAAGTTTTTATGAG                                                            | Genotyping                                      |
| <i>PpPAM68</i>       | Pam_PP_KO_s2<br>ATCGACCATGTTGCCCTCCACTGCT                                    | Pam_PP_KO_as<br>AGCGATCAGATAGAACAGCTGCACC                                                     | Knockout construct<br>in <i>P. patens</i>       |
| <i>PpPAM68/nptII</i> | Pam68_ver_5'_s (P1):<br>AAAGCTTAAGCAAGCAAGCGAGGCTGCCT                        | Pam68_ver_5'_as (P2):<br>GGAGGTTTCCCGAAATTACCCTTTGTTGAA                                       | knockout screening<br>for <i>PpPAM68</i> 5' end |
| <i>PpPAM68/nptII</i> | Pam68_ver_3'_s (P3):<br>TAGTTTCCCGATAAAGGGAAATTAGGGTTCT                      | Pam68_ver_3'_as (P4):<br>CCTGCTGTAAACCATGCAACCCTAAATGC                                        | knockout screening<br>for <i>PpPAM68</i> 3' end |
| <i>PpLHCB4</i>       | PpLhcb4.1-4.4for<br>CATCTCGAAGAAGGAGGAGATCG                                  | PpLhcb4.1-4.4rev<br>CGAAGTTCAGTGGGTCGAAGAAC                                                   | RT-PCR in<br><i>P. patens</i>                   |
